# Supplementary material for: Synthetic heparan sulfate ligands for vascular endothelial growth factor to modulate angiogenesis
Source: Royal Society of Chemistry journal article supplement (doi:10.1039/d1cc00964h), 2021-01-01
Supplement: d1cc00964h1.xlsx [file d1cc00964h1.xlsx]

## Sheet: Sheet3
		Title:	Synthetic Heparan Sulfate Ligands for Vascular Endothelial Growth Factor to Modulate Angiogenesis
		Glass slide:	PolyAn 2D Epoxy covered Slides (104-00-221)
		Primary binding:	Growth Factors, 3 dilutions
		Primary binding volume:	100µl
		Secondary AB:	Biotinylated-specific anti Growth-Factor
		Secondary AB Concentration:	1µg/ml
		Secondary AB volume:	200µl
		Scanned by	Genepix 4000B (molecular devices) at PMT 350
		Use the following buffers:
		Chemical blocking	0.1M Tris pH 9 + 0.05M Ethanolamine
		Biological blocking	PBS pH 7.3 + 1% w/v Ovalbumin
		Wash buffer:	PBS + 0.1% Tween 20
		Primary buffer:	PBS pH 7.3 + 1% w/v Ovalbumin
		Secondary buffer:	PBS pH 7.3
		Primary Detection	Human BMP2				Human BMP2				Human BMP2				Human VEGF-165				Human VEGF-165				Human VEGF-165				Human FGF2 (basic)				Human FGF2 (basic)				Human FGF2 (basic)				Human HB-EGF				Human HB-EGF				Human HB-EGF
		Primary Detection Dilution	2 µg/ml				1 µg/ml				0.5 µg/ml				5 µg/ml				2.5 µg/ml				1.25 µg/ml				20 µg/ml				10 µg/ml				5 µg/ml				20 µg/ml				10 µg/ml				5 µg/ml
		2' antibody	Human BMP-2 Detection Antibody				Human BMP-2 Detection Antibody				Human BMP-2 Detection Antibody				Biotinylated-Rabbit αHuman VEGF-165				Biotinylated-Rabbit αHuman VEGF-165				Biotinylated-Rabbit αHuman VEGF-165				Biotinylated-FGF2 polyclonal antibody				Biotinylated-FGF2 polyclonal antibody				Biotinylated-FGF2 polyclonal antibody				Biotinylated-Rabbit αHuman HB-EGF				Biotinylated-Rabbit αHuman HB-EGF				Biotinylated-Rabbit αHuman HB-EGF
		2' antibody Dilution	1 µg/ml				1 µg/ml				1 µg/ml				1 µg/ml				1 µg/ml				1 µg/ml				1 µg/ml				1 µg/ml				1 µg/ml				1 µg/ml				1 µg/ml				1 µg/ml
		Concentration	50		100		50		100		50		100		50		100		50		100		50		100		50		100		50		100		50		100		50		100		50		100		50		100
		Block	7		7		9		9		11		11		7		7		9		9		11		11		2		2		4		4		6		6		7		7		9		9		11		11
		slide number	4		4		4		4		4		4		2		2		2		2		2		2		1		1		1		1		1		1		3		3		3		3		3		3
	Glycan ID	Glycan Structure	Mean	STD	Mean	STD	Mean	STD	Mean	STD	Mean	STD	Mean	STD	Mean	STD	Mean	STD	Mean	STD	Mean	STD	Mean	STD	Mean	STD	Mean	STD	Mean	STD	Mean	STD	Mean	STD	Mean	STD	Mean	STD	Mean	STD	Mean	STD	Mean	STD	Mean	STD	Mean	STD	Mean
	HT-0S-NH	GlcNHα(1-4)IdoAα(1-4)GlcNHα(1-4)IdoA-proNH2	1555.75	191.962	1586.67	827.357	1044.5	614.951	1158.5	143.156	996	575.296	556	10.2307	16417	8268.93	9495	401.036	11396.5	879.746	4014	2257.49	5002.5	635.607	1726	866.428	161	4.54606	184.5	21.9165	214.75	37.7304	175	92.0557	248.75	15.9452	277	40.2244	1131.67	786.374	2067	83.2386	1420	823.346	1591.5	20.8247	1334	669.122	708
	HT-0S-NAc	GlcNAcα(1-4)IdoAα(1-4)GlcNAcα(1-4)IdoA-proNH2	357.5	220.93	229.667	115.257	153.667	82.9473	101	51.1754	110	8.83176	71	35.5094	1406	89.6103	693	84.7388	433.667	219.488	237	31.1769	299.5	173.267	190.75	17.7271	41.3333	21.6179	6.66667	4.76095	30.25	5.7373	23	13.5031	31	4.83046	47.6667	24.6221	825.667	441.37	622.25	69.9542	388	65.7318	240	128.647	586	375.759	118
	HT-2S-NH	GlcNHα(1-4)IdoA(2S)α(1-4)GlcNHα(1-4)IdoA(2S)-proNH2	1815.25	48.072	2230.75	273.241	1158.33	607.685	2468	116.999	2219.5	281.068	2641.33	1324.7	22611.8	4318.22	21428.5	5174.59	17390.3	9201.97	16515.2	725.873	13979.2	2575.01	12136.7	6143.73	197.25	21.0456	193.333	98.7218	214	107.525	271.75	44.9991	257	131.244	716.667	492.672	1397	749.08	2751	1672.66	4038	2057.14	4051.33	2182.25	3291.25	148.401	3038
	HT-2S-NAc	GlcNAcα(1-4)IdoA(2S)α(1-4)GlcNAcα(1-4)IdoA(2S)-proNH2	250.333	163.431	186	22.0454	92.6667	48.5558	79	9.0185	69	35.3023	60.75	9.94569	1051.5	169.294	606	43.7188	358.5	59.6574	259.75	48.897	246	128.022	141	71.402	27.75	5.18813	37.5	21.7466	24.3333	12.6326	5.66667	9.46485	22.3333	11.2064	19.75	2.21736	1004.5	196.076	754.25	98.0013	339	201.563	292.5	171.208	239.5	138.276	59.6667
	HT-6S-NH	GlcNH(6S)α(1-4)IdoAα(1-4)GlcNH(6S)α(1-4)IdoA-proNH2	584.75	104.974	110	12.7541	249.333	132.502	110.25	21.5619	131.25	9.17878	43	7.11805	3460.75	27.0231	944.5	138.894	1333.5	772.697	460	56.5862	727.25	74.9994	184.5	6.85565	176	92.8763	168.5	10.6615	239.333	123.603	151.667	76.9085	341	221.759	119.5	22.6348	1466	106.151	847.333	423.73	987	569.873	283.5	163.903	436.667	218.927	105.75
	HT-6S-NAc	GlcNAc(6S)α(1-4)IdoAα(1-4)GlcNAc(6S)α(1-4)IdoA-proNH2	2349.5	88.8838	2487.33	1247.72	2719.75	151.944	2898	473.402	3101	1561.3	2813	1624.71	21171	4978.47	27831.2	248.203	16954.8	2945.19	13790.7	6895.87	9304	1445.94	10241.2	832.632	350.333	176.234	196.5	24.6644	307.5	46.1916	231	11.8603	614.333	311.826	271.75	38.6555	3536	1769.88	3382.25	644.674	3547.67	1775.94	3255.33	1787.62	2715.5	65.9621	2897.67
	HT-3S-NH	GlcNH(3S)α(1-4)IdoAα(1-4)GlcNH(3S)α(1-4)IdoA-proNH2	1835	26.7457	1578	985.384	1300.33	650.261	2179	1118.58	2405.33	1230.59	2618.75	44.53	13032	7525.43	19453.5	634.502	16566.3	8296.4	17360	8713.69	18236	10529.5	18502	122.689	181	27.1662	225.25	6.5	178.333	89.2053	273.667	137.209	307	157.146	1410.67	709.082	1747.33	968.168	2470.25	62.0611	2214.33	1187.44	3021	1634.42	3229	1681.39	3942.33
	HT-2,6S-NH	GlcNH(6S)α(1-4)IdoA(2S)α(1-4)GlcNH(6S)α(1-4)IdoA(2S)-proNH2	1802.25	122.023	1918	101.137	1700.33	906.544	2165.67	1156.89	3021.33	1510.85	3057.75	71.3413	23437.8	4386.76	18129.3	9066.21	22934.5	701.485	21238.2	4158.59	22523	11891	22158	11924.2	224.333	113.141	226.5	30.6213	367.75	56.5825	308	18.1108	462	287.147	317	160.863	3259	49.8799	3435.75	168.714	4270.5	88.123	2856.67	1446.53	3655	710.87	4103.67
	HT-2,6S-NAc	GlcNAc(6S)-IdoA(2S)-GlcNAc(6S)-IdoA(2S)-NH2	1869.5	51.6753	1804.75	241.044	2677	1357.37	3175	1588.45	2145.67	1099.74	3408.75	261.399	19844.7	10572.1	21421.5	3765.32	24700	603.852	16717.5	3236.55	26213	4303.35	23339.5	607.621	288.667	154.111	211	105.655	297.75	36.022	256.333	128.453	673.667	395.381	315.75	18.6615	2884.33	1560.58	2584.25	863.054	3999.67	2000.09	4269.5	2465.61	4407.5	142.224	4474
	HT-3,6S-NH	GlcNH(3S,6S)α(1-4)IdoAα(1-4)GlcNH(3S,6S)α(1-4)IdoA-proNH2	1790.33	897.38	2022.25	163.98	1138.67	570.202	2364.5	240.103	3038.33	1521.94	2647.67	1342.15	21880.2	5288.69	18695.2	329.866	16741	8973.38	23666.3	12252.4	17416	431.222	24979.5	4784.23	205.25	9.21502	310.333	211.072	254.5	15.3731	272.333	137.904	368.5	53.0189	551.333	280.481	2657.5	616.033	2783	1486.69	3005.75	819.251	5877.25	1028.15	4163.25	219.582	4284.33
	HT-2,3S-NH	GlcNH(3S)α(1-4)IdoA(2S)α(1-4)GlcNH(3S)α(1-4)IdoA(2S)-proNH2	1852.5	46.3645	1539.67	780.218	1326.67	665.18	757.667	402.407	785.75	89.7678	498.5	47.564	9844	2320.25	5731.75	1546.96	5968.5	1259.72	2414.33	1209.96	2959	187.382	1189.33	655.699	253.667	152.515	235	54.4488	241.75	40.3516	182.5	9.46925	246	130.687	182.667	99.0925	2362.75	391.02	2128.5	185.115	1963.5	51.3452	3092.33	1554.03	1080	542.849	759.667
	HT-62P	GlcNAc(6P)α(1-4)IdoA(2P)α(1-4)GlcNAc(6P)α(1-4)IdoA(2P)-proNH2	1984.5	1146.49	2109.25	127.897	2547.5	1470.9	2801.25	853.301	2338	1169.93	2145	1245.2	22182.5	363.584	18163.8	4380.66	20010.8	601.043	13106	2151.01	16448	507.262	11800	5989.58	233.333	134.752	140.667	70.4012	246.333	123.254	214.333	109.177	369	273.058	296	171.924	4665.67	2429.17	2356.67	1181.3	3966.25	1423.57	3340	124.932	2205.75	661.896	2770.33
	HT-6P	GlcNAc(6P)α(1-4)IdoAα(1-4)GlcNAc(6P)α(1-4)IdoA-proNH2	1321	761.382	1948.75	67.0591	3019	1513.46	2093	1259.28	1634	839.391	1667	318.219	14616.5	2525.16	6507.5	294.162	4596	626.72	2838	1654.17	2830.75	231.953	1304.5	75.8881	152.667	79.2528	161.333	81.3101	178.667	95.4289	149.667	75.3232	142.667	72.0787	157	93.4826	1916	967.098	2109.67	1064.05	1790.67	940.377	2133	1118.91	958.25	115.972	2128.75
[truncated: 1 more columns]
